# Supplementary material
Source: Research Square preprint supplement (doi:10.21203/rs.3.rs-10344912/v1)
Supplement: Supplementary file 1 [file b0a4245c7da3fb2dacfc34ce.docx]

Supplementary Material

Integrated Optimization of Yellow Lentil Protein Recovery by Alkaline Extraction and Isoelectric Precipitation: Process Efficiency, Nutritional Quality, and Techno-Functional Properties

Food and Bioprocess Technology

Lisa Ziegltrum 1,*, Sara Cutroneo 2, Tullia Tedeschi 2, Ute Schweiggert-Weisz 3,4, Özlem Özmutlu Karslioglu 1

1 Institute of Food Technology, Weihenstephan-Triesdorf University of Applied Sciences, Am Staudengarten 11, 85354 Freising, Germany

2 Department of Food and Drug, University of Parma, Parco Area Delle Scienze 17/A, 43124 Parma, Italy

3 Plant Proteins and Nutrition, Technical University of Munich, Weihenstephaner Berg 1, 85354 Freising, Germany

4 Fraunhofer Institute for Process Engineering and Packaging (IVV), Giggenhauser Straße 35, 85354 Freising, Germany

***** Correspondence: lisa.ziegltrum@hswt.de


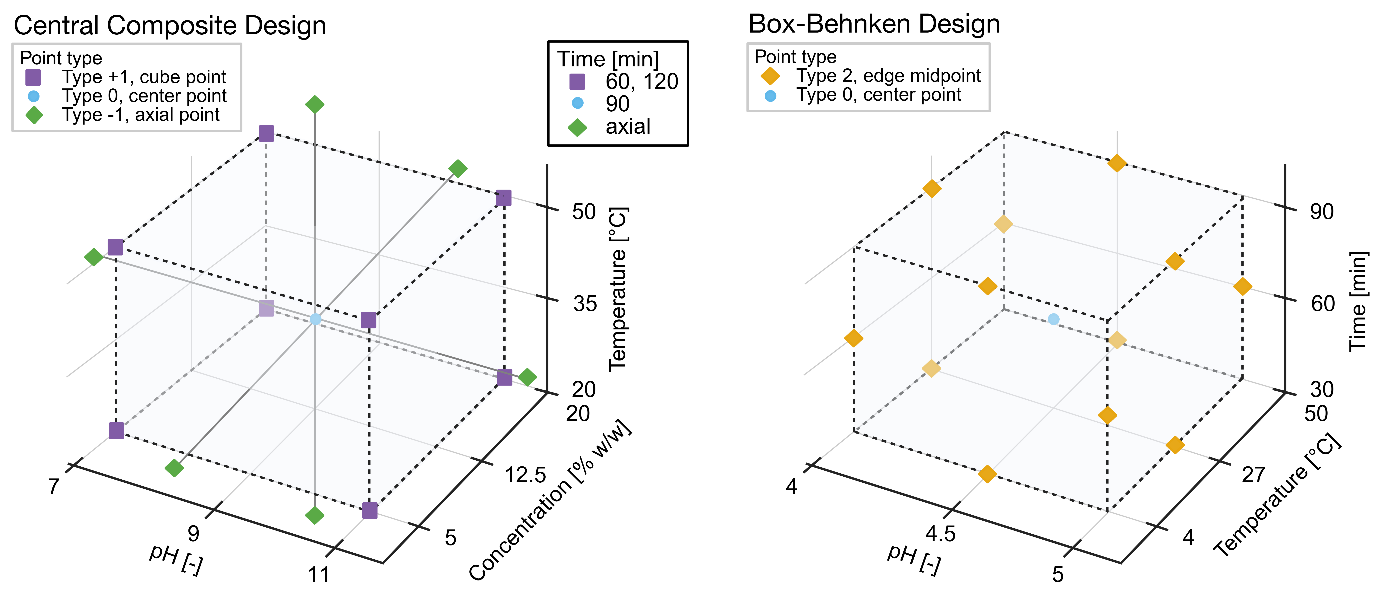


**Figure S1** Factor levels (minimum, maximum, center, and axial values) of the central composite design for optimizing alkaline extraction and factor levels (minimum, maximum, and center values) of the Box-Behnken design for optimizing isoelectric precipitation. Created in BioRender. Ziegltrum, L. (2026) https://BioRender.com/kocvr0o

**Table S1** Central composite design experimental plan with responses and predicted values for protein yield from alkaline extraction

Runs 29-31 were carried out as additional experiments and incorporated into the final model. In the course of model refinement, however, three star-point runs were excluded because they were marked as unusual observations and produced a significant lack-of-fit (p < 0.05). These points corresponded to the most extreme factor levels (pH 12 and temperatures of 5 °C and 65 °C). As such extreme conditions are not relevant for practical application, their removal was deemed appropriate and did not compromise the validity of the model.

| **Runs** | **pH** | **Concentration** | **Temperature** | **Time** | **Protein yield [%]** | |
| --- | --- | --- | --- | --- | --- | --- |
|  |  | **[%w/w]** | **[°C]** | **[min]** | **Experimental** | **Predicted** |
| 1 | 7 | 5 | 20 | 60 | 92.30±0.59 a,b,c,d | 89.13 |
| 2 | 11 | 5 | 20 | 60 | 91.46±0.71 b,c,d,e | 92.57 |
| 3 | 7 | 20 | 20 | 60 | 83.28±2.03 j,k | 84.33 |
| 4 | 11 | 20 | 20 | 60 | 84.66±1.39 h,i,j,k | 83.86 |
| 5 | 7 | 5 | 50 | 60 | 90.16±0.68 b,c,d,e,f | 91.78 |
| 6 | 11 | 5 | 50 | 60 | 96.49±1.79 a | 95.22 |
| 7 | 7 | 20 | 50 | 60 | 84.70±1.17 h,i,j,k | 83.61 |
| 8 | 11 | 20 | 50 | 60 | 84.21±0.66 i,j,k | 83.14 |
| 9 | 7 | 5 | 20 | 120 | 90.48±1.59 b,c,d,e | 91.38 |
| 10 | 11 | 5 | 20 | 120 | 94.85±0.90 a,b | 94.82 |
| 11 | 7 | 20 | 20 | 120 | 85.19±0.99 g,h,i,j,k | 86.57 |
| 12 | 11 | 20 | 20 | 120 | 86.99±0.24 e,f,g,h,i,j | 86.10 |
| 13 | 7 | 5 | 50 | 120 | 89.30±0.55 d,e,f,g,h | 89.31 |
| 14 | 11 | 5 | 50 | 120 | 94.30±0.60 a,b,c | 92.75 |
| 15 | 7 | 20 | 50 | 120 | 81.20±2.56 k,l | 81.15 |
| 16 | 11 | 20 | 50 | 120 | 77.73±1.02 l,m | 80.67 |
| 17 | 5 | 12.5 | 35 | 90 | 19.19±0.58 o | 22.14 |
| 18 | 9 | 0.5 | 35 | 90 | 88.75±1.48 d,e,f,g,h,i | 91.64 |
| 19 | 9 | 27.5 | 35 | 90 | 75.34±1.10 m | 75.34 |
| 20 | 9 | 12.5 | 35 | 30 | 88.18±2.93 d,e,f,g,h,i | 89.72 |
| 21 | 9 | 12.5 | 35 | 150 | 91.14±1.29 b,c,d,e | 89.50 |
| 22 | 9 | 12.5 | 35 | 90 | 86.74±2.30 e,f,g,h,i,j | 86.87 |
| 23 | 9 | 12.5 | 35 | 90 | 82.81±1.58 j,k | 86.87 |
| 24 | 9 | 12.5 | 35 | 90 | 85.43±1.78 f,g,h,i,j,k | 86.87 |
| 25 | 9 | 12.5 | 35 | 90 | 84.54±2.08 h,i,j,k | 86.87 |
| 26 | 9 | 12.5 | 35 | 90 | 87.51±2.64 e,f,g,h,i,j | 86.87 |
| 27 | 9 | 12.5 | 35 | 90 | 84.73±1.45 h,i,j,k | 86.87 |
| 28 | 9 | 12.5 | 35 | 90 | 89.65±0.56 c,d,e,f,g | 86.87 |
| 29 | 9 | 5 | 35 | 90 | 94.62±0.63 a,b | 90.32 |
| 30 | 9 | 20 | 35 | 90 | 85.39±0.48 g,h,i,j,k | 81.87 |
| 31 | 6 | 12.5 | 35 | 90 | 55.50±1.80 n | 50.18 |


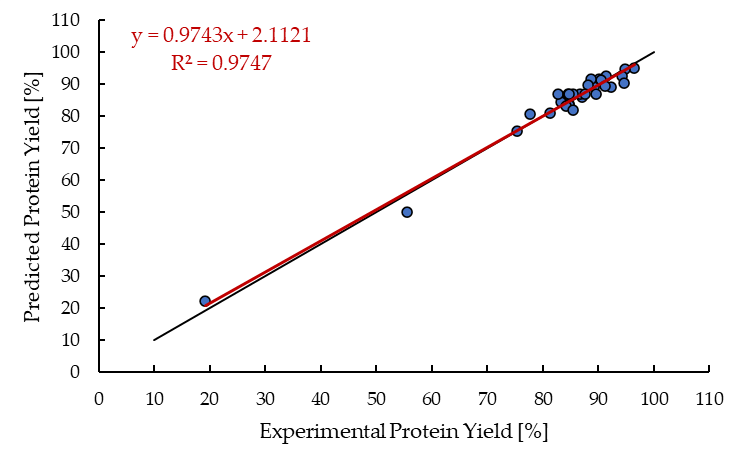


**Figure S2** Comparison between predicted and experimental protein yield [%] of alkaline extraction; black: 1:1 line, red: regression line; Mean Absolute Error (MAE) = 2.09%, Root Mean Squared Error (RMSE) = 2.70%, Bias = 0.05%

**Table S2** Box-Behnken design experimental plan with responses and predicted values for protein yield from isoelectric precipitation

| **Runs** | **pH** | **Temperature** | **Time** | **Protein yield [%]** | |
| --- | --- | --- | --- | --- | --- |
|  |  | **[°C]** | **[min]** | **Experimental** | **Predicted** |
| 1 | 5 | 4 | 60 | 69.43±1.25 b,c | 74.53 |
| 2 | 4.5 | 50 | 90 | 74.29±2.56 a | 62.61 |
| 3 | 4.5 | 27 | 60 | 70.47±1.34 a,b,c | 65.16 |
| 4 | 4.5 | 27 | 60 | 67.24±0.48 b,c,d,e,f | 65.16 |
| 5 | 5 | 27 | 90 | 68.99±1.15 b,c,d | 68.74 |
| 6 | 5 | 27 | 30 | 71.88±0.94 a,b | 70.77 |
| 7 | 4.5 | 4 | 30 | 68.18±2.83 b,c,d,e | 66.98 |
| 8 | 4 | 27 | 30 | 68.62±1.48 b,c,d | 69.53 |
| 9 | 4.5 | 50 | 30 | 69.13±1.88 b,c | 68.53 |
| 10 | 4 | 50 | 60 | 63.20±1.86 f | 70.95 |
| 11 | 4 | 27 | 90 | 66.06±1.06 c,d,e,f | 67.49 |
| 12 | 4.5 | 27 | 60 | 64.40±0.97 d,e,f | 65.16 |
| 13 | 5 | 50 | 60 | 63.61±0.88 e,f | 68.15 |


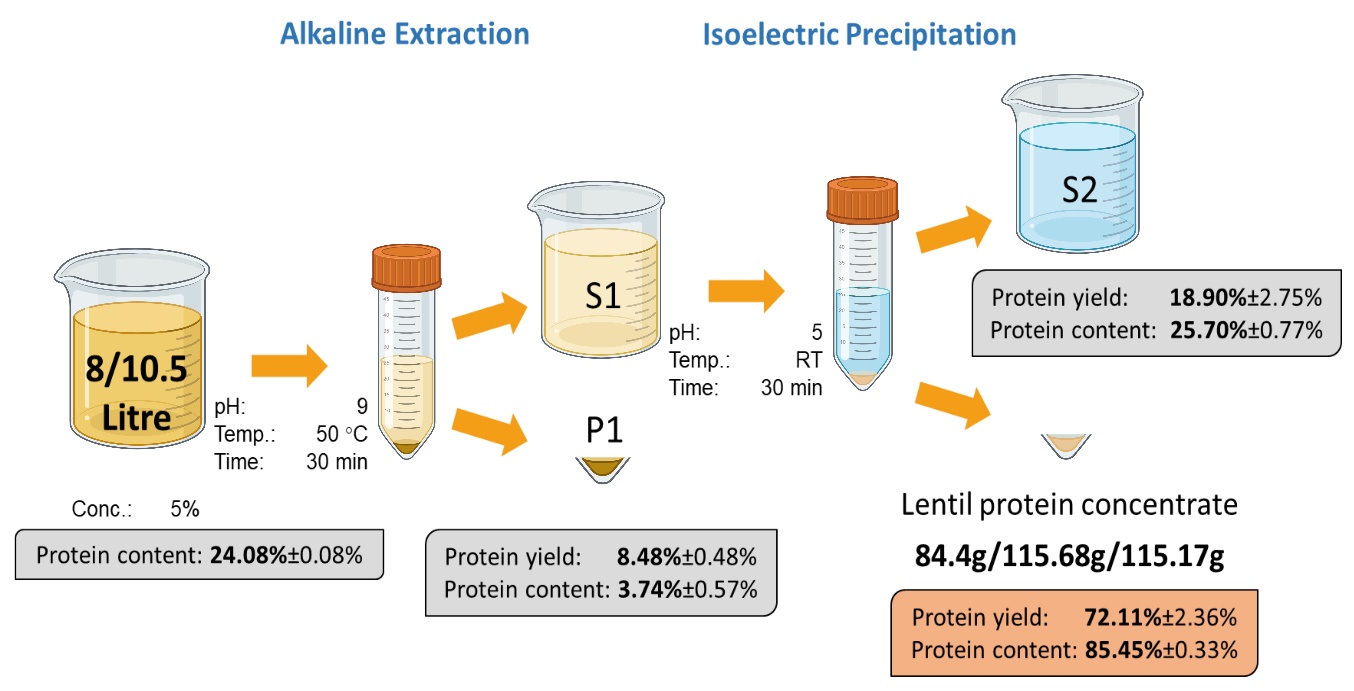


**Figure S3** Mass balance across the lentil protein extraction process, including protein contents and protein yield losses during alkaline extraction and isoelectric precipitation. Values are presented as mean ± standard deviation (n = 3). Created in BioRender. Ziegltrum, L. (2026) https://BioRender.com/je1t759

| 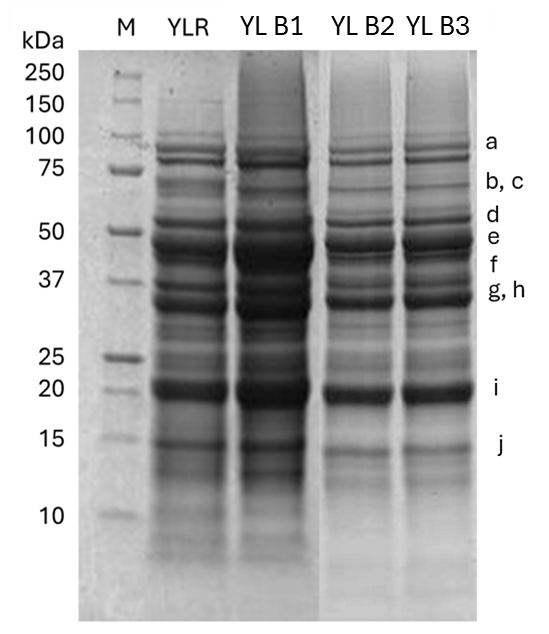 | **Band** | **MW (kDa)** | **Description** |
| --- | --- | --- | --- |
| a | 95 | Linoleate 9S-lipoxygenase1 |
| b | 66 | Seed-specific biotinylated protein2 |
| c | 63 | Convicilin subunit1,3,4 |
| d | 50 | Vicilin subunits3,4 |
| e | 48 | Vicilin2 |
| f | 40 | Legumin-acidic subunit1,3 |
| g | 37 | IgE-binding protein2 |
| h | 33 | Major vicilin subunit1 |
| i | 20 | Legumin-basic subunit1,3 |
| j | 15 | Minor vicilin subunit1 |

**Table S3** Protein profile of yellow lentil extracts (YL B1-3) compared to the raw sample (YLR). M: molecular marker and Protein putative attribution for comparison with the literature (1Shrestha et al. (2024), 2Valdelvira et al. (2022), 3Jamirul Ashad Zehadi (2015), 4Barbana and Boye (2013), organism: *Lens Culinaris*)

**
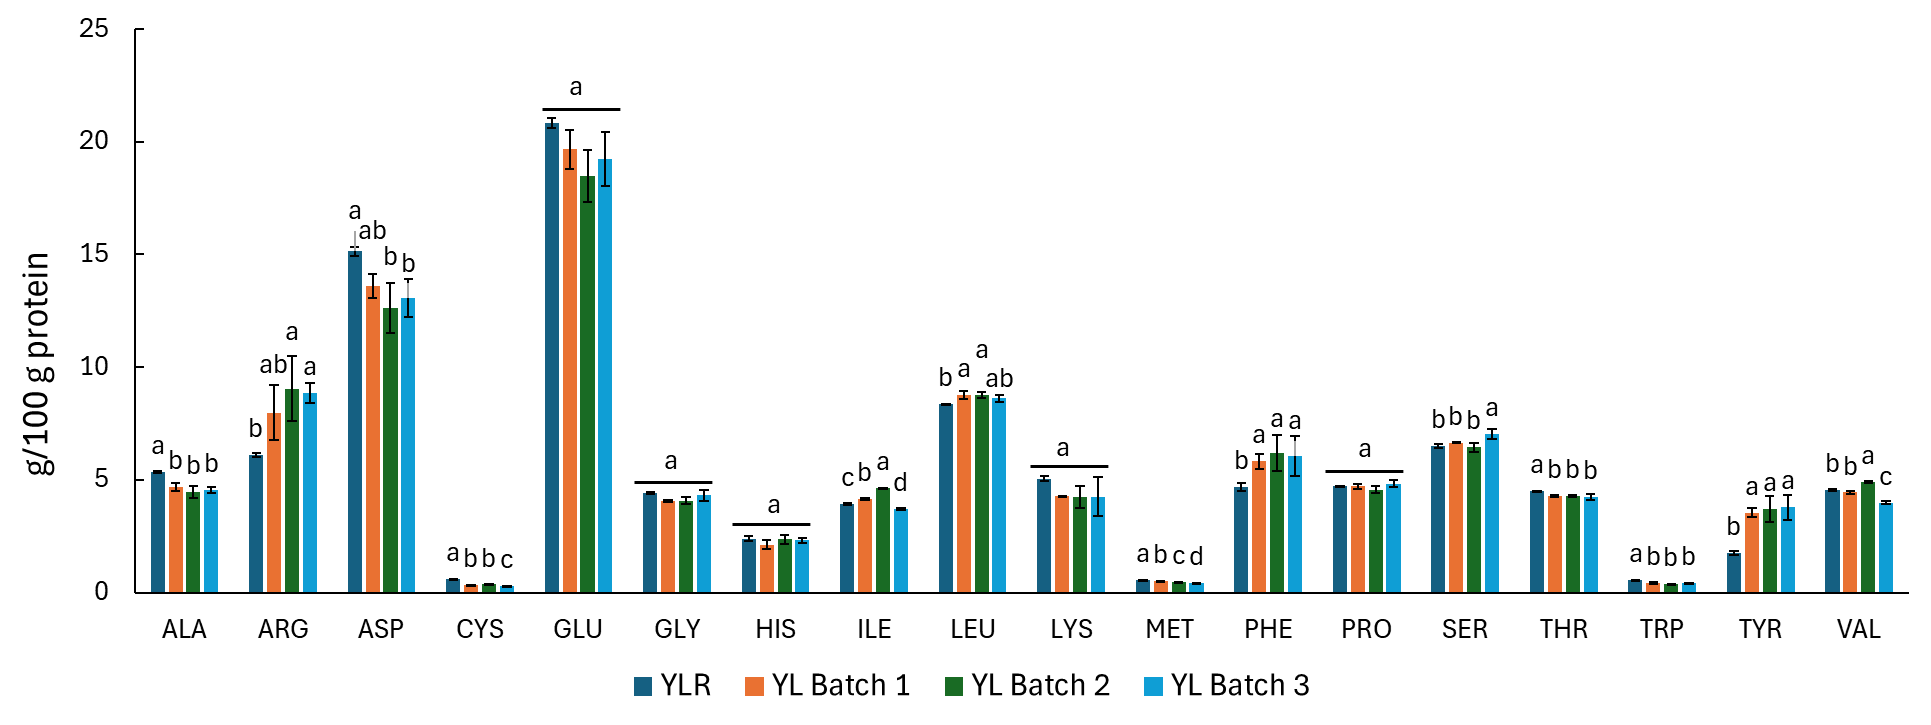
**

**Figure S4** Amino acid profile of samples, expressed as g per 100 g of protein. Letters on bars refer to differences between samples

**Table S4** Amino acid score (AAS) calculated according to FAO (2011), indispensable amino acid requirements for children (3-18 years) and adults. Values below 1 are underlined, and the first limiting amino acid is highlighted in bold

| **Amino acid score** | | | | | | | | | |
| --- | --- | --- | --- | --- | --- | --- | --- | --- | --- |
| **Children (3- 18)** | **His** | **Ile** | **Leu** | **Lys** | **SAA** | **AAA** | **Thr** | **Trp** | **Val** |
| YLR | 1.50 | 1.31 | 1.37 | 1.05 | **0.49** | 1.57 | 1.80 | 0.81 | 1.14 |
| YL Batch 1 | 1.33 | 1.39 | 1.44 | 0.89 | **0.36** | 2.28 | 1.71 | 0.58 | 1.11 |
| YL Batch 2 | 1.48 | 1.54 | 1.44 | 0.89 | **0.35** | 2.41 | 1.71 | 0.52 | 1.23 |
| YL Batch 3 | 1.44 | 1.23 | 1.41 | 0.88 | **0.31** | 2.40 | 1.70 | 0.58 | 1.00 |
| **Adults** | **His** | **Ile** | **Leu** | **Lys** | **SAA** | **AAA** | **Thr** | **Trp** | **Val** |
| YLR | 1.60 | 1.31 | 1.42 | 1.12 | **0.51** | 1.69 | 1.96 | 0.94 | 1.17 |
| YL Batch 1 | 1.42 | 1.39 | 1.49 | 0.95 | **0.38** | 2.46 | 1.86 | 0.68 | 1.14 |
| YL Batch 2 | 1.58 | 1.54 | 1.49 | 0.95 | **0.37** | 2.60 | 1.86 | 0.60 | 1.26 |
| YL Batch 3 | 1.54 | 1.23 | 1.46 | 0.94 | **0.32** | 2.59 | 1.85 | 0.68 | 1.02 |
